# Supplementary material for: Dynamic data transmission technology for expendable current profiler based on low-voltage differential signaling
Source: Copernicus journal article supplement (doi:10.5194/gi-2017-6), 2017-04-07
Supplement: Supplementary file [file gi-2017-6-AC2-supplement.pdf]

Dear Referee #2,

Thank you very much for your precious time to spend on our manuscript. Your comments are all valuable and very helpful for revising and improving our paper. According to your comments, we have checked the manuscript carefully and made necessary revisions accordingly.
