# Supplementary material for: Dynamic data transmission technology for expendable current profiler based on low-voltage differential signaling
Source: Copernicus journal article supplement (doi:10.5194/gi-2017-6), 2017-04-07
Supplement: Supplementary file [file gi-2017-6-RC1-supplement.pdf]

This manuscript focuses on the research on an XCP data transmission technology which is original and meaningful in this field. It falls into the scope of GI and is scientifically sound to be published in its discussion forum. But there are still some minor revisions should be done. Please follow the comments below and revise your manuscript carefully.

(1) In this paper, the word “float” appears many times, maybe the word “buoy” is more appropriate than “float”.

(2) In Fig. 4, the abbreviation “SoPC” should be defined or explained in the manuscript.

(3) In p. 4, line 5. In the proposed receiving technique, the majority vote method based three sampled signal level near the center of the bit. The authors should explain comparison with other method with additional parameters such as five or seven samples. It should be shown that the parameter of three samples is optimum.

(4) In the part of conclusion, the BER of data should be added.
